# Supplementary material for: Differential Expression and Bioinformatics Analysis of Plasma-Derived Exosomal circRNA in Type 1 Diabetes Mellitus
Source: Hindawi journal article supplement (doi:10.1155/2022/3625052), 2022-10-27

COG Function Classification of Consensus Sequence

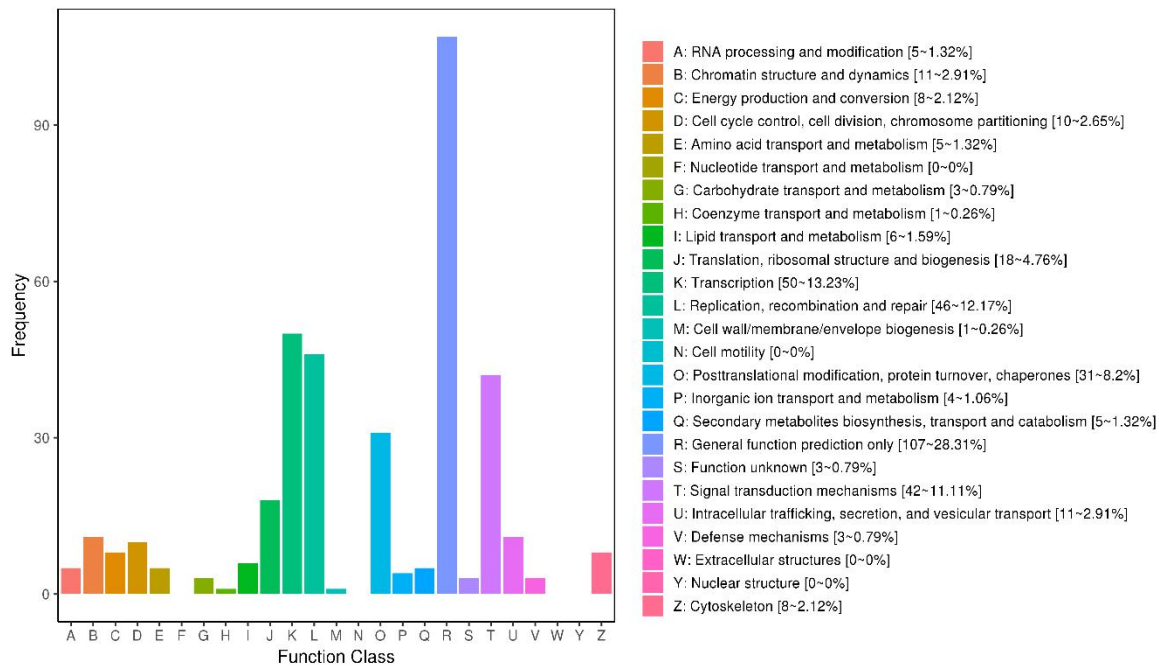

KOG Function Classification of Consensus Sequence

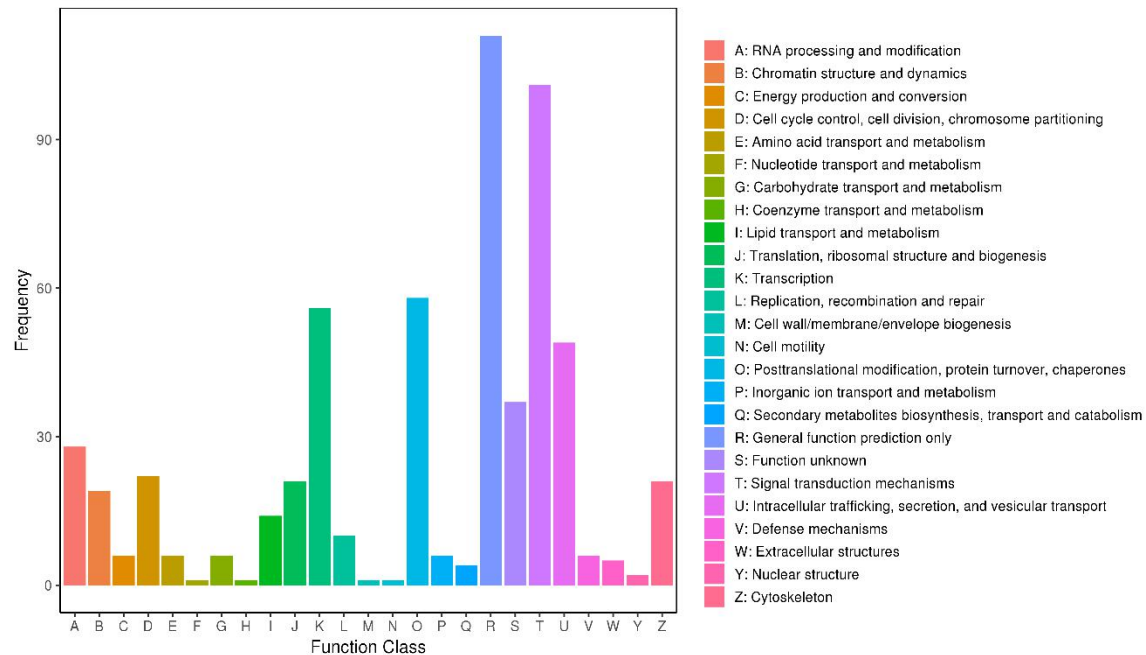

Supplement: f4 [file 3625052.f4.pdf]
