# Supplementary material for: Differential Expression and Bioinformatics Analysis of Plasma-Derived Exosomal circRNA in Type 1 Diabetes Mellitus
Source: Hindawi journal article supplement (doi:10.1155/2022/3625052), 2022-10-27
Supplement: f7 [file 3625052.f7.pdf]

| #ID                   | P-Value     | FDR         | log2FC     | Regulated |
|-----------------------|-------------|-------------|------------|-----------|
| 1:1712264 1716478     | 0.000659727 | 0.232918694 | Inf        | up        |
| 1:1804419 1815862     | 0.038544646 | 0.232918694 | #NAME?     | down      |
| 1:1804419 1817875     | 0.008220523 | 0.232918694 | Inf        | up        |
| 1:1804419 1839238     | 3.97E-05    | 0.091475138 | Inf        | up        |
| 1:10095461 10105744   | 0.015866561 | 0.232918694 | Inf        | up        |
| 1:10291082 10297246   | 0.005882573 | 0.232918694 | #NAME?     | down      |
| 1:12001401 12002103   | 0.037278    | 0.232918694 | 3.05602796 | up        |
| 1:15536475 15536814   | 0.021604355 | 0.232918694 | Inf        | up        |
| 1:21002713 21111383   | 0.047568274 | 0.232918694 | Inf        | up        |
| 1:23055069 23069151   | 0.032209314 | 0.232918694 | Inf        | up        |
| 1:24649971 24651612   | 0.045775647 | 0.232918694 | Inf        | up        |
| 1:28048383 28058094   | 0.02401887  | 0.232918694 | Inf        | up        |
| 1:28476107 28480604   | 0.012173763 | 0.232918694 | Inf        | up        |
| 1:28580560 28581229   | 0.034063652 | 0.232918694 | Inf        | up        |
| 1:28987431 28997319   | 0.04989836  | 0.232918694 | Inf        | up        |
| 1:29148080 29149226   | 0.024902481 | 0.232918694 | #NAME?     | down      |
| 1:30992390 30995220   | 0.041968881 | 0.232918694 | -1.5286904 | down      |
| 1:31346640 31348974   | 0.025806669 | 0.232918694 | Inf        | up        |
| 1:33294937 33295305   | 0.023772867 | 0.232918694 | 1.89007288 | up        |
| 1:35392212 35399576   | 0.012668496 | 0.232918694 | Inf        | up        |
| 1:35745451 35746992   | 0.039700765 | 0.232918694 | Inf        | up        |
| 1:37987573 37987836   | 0.010981889 | 0.232918694 | #NAME?     | down      |
| 1:42265115 42323827   | 0.043835573 | 0.232918694 | #NAME?     | down      |
| 1:51840226 51840514   | 0.042052131 | 0.232918694 | Inf        | up        |
| 1:61109778 61112343   | 0.047562715 | 0.232918694 | Inf        | up        |
| 1:61111371 61112343   | 0.02409574  | 0.232918694 | Inf        | up        |
| 1:61404104 61406727   | 0.049515606 | 0.232918694 | Inf        | up        |
| 1:65364635 65366196   | 0.033015384 | 0.232918694 | 5.7023042  | up        |
| 1:66958059 66959743   | 0.021582982 | 0.232918694 | #NAME?     | down      |
| 1:75732644 75750546   | 0.024903621 | 0.232918694 | #NAME?     | down      |
| 1:75745806 75750546   | 0.014825343 | 0.232918694 | #NAME?     | down      |
| 1:77916055 77918273   | 0.001974102 | 0.232918694 | Inf        | up        |
| 1:88770352 88771879   | 0.027111395 | 0.232918694 | Inf        | up        |
| 1:100136882 100137085 | 0.014847246 | 0.232918694 | #NAME?     | down      |
| 1:108752257 108760085 | 0.029196265 | 0.232918694 | Inf        | up        |
| 1:110891392 110892533 | 0.000718435 | 0.232918694 | #NAME?     | down      |
| 1:111147642 111174963 | 0.004566966 | 0.232918694 | Inf        | up        |
| 1:112591525 112616895 | 0.010998361 | 0.232918694 | #NAME?     | down      |
| 1:112653598 112667145 | 0.014127249 | 0.232918694 | Inf        | up        |
| 1:113825142 113834439 | 0.008764444 | 0.232918694 | Inf        | up        |
| 1:150226608 150229237 | 0.024528871 | 0.232918694 | Inf        | up        |
| 1:151117392 151118139 | 0.02527943  | 0.232918694 | Inf        | up        |
| 1:151638888 151668635 | 0.046794375 | 0.232918694 | Inf        | up        |
| 1:153811731 153813452 | 0.018204292 | 0.232918694 | Inf        | up        |
| 1:155661307 155777820 | 0.04696687  | 0.232918694 | #NAME?     | down      |
| 1:155717006 155726019 | 0.047247375 | 0.232918694 | Inf        | up        |
| 1:155813634 155814449 | 0.038216939 | 0.232918694 | Inf        | up        |
| 1:156320839 156334918 | 0.02959139  | 0.232918694 | Inf        | up        |
| 1:160624096 160634897 | 0.020318886 | 0.232918694 | #NAME?     | down      |
| 1:171523221 171532961 | 0.03438895  | 0.232918694 | -4.956657  | down      |

|             |           |             |             |           |      |
|-------------|-----------|-------------|-------------|-----------|------|
| 1:172042009 | 172131288 | 0.034692356 | 0.232918694 | Inf       | up   |
| 1:172551512 | 172579267 | 0.000765182 | 0.232918694 | Inf       | up   |
| 1:174272414 | 174287770 | 0.046833081 | 0.232918694 | Inf       | up   |
| 1:174272414 | 174305127 | 0.001890568 | 0.232918694 | Inf       | up   |
| 1:174304986 | 174371072 | 0.008664354 | 0.232918694 | #NAME?    | down |
| 1:180084018 | 180087717 | 0.045333363 | 0.232918694 | #NAME?    | down |
| 1:185202654 | 185222036 | 0.011862867 | 0.232918694 | Inf       | up   |
| 1:193203795 | 193212477 | 0.007673997 | 0.232918694 | Inf       | up   |
| 1:205268950 | 205269884 | 0.043434283 | 0.232918694 | Inf       | up   |
| 1:205727700 | 205729621 | 0.003237604 | 0.232918694 | #NAME?    | down |
| 1:207694353 | 207740418 | 0.010993041 | 0.232918694 | Inf       | up   |
| 1:209830108 | 209831043 | 0.00193635  | 0.232918694 | #NAME?    | down |
| 1:219193082 | 219218712 | 0.045158895 | 0.232918694 | Inf       | up   |
| 1:220102129 | 220102777 | 0.017083108 | 0.232918694 | #NAME?    | down |
| 1:220212887 | 220213979 | 0.008570858 | 0.232918694 | Inf       | up   |
| 1:222823884 | 222835215 | 0.035052073 | 0.232918694 | Inf       | up   |
| 1:224267004 | 224268133 | 0.048816449 | 0.232918694 | Inf       | up   |
| 1:224317694 | 224326464 | 0.006516432 | 0.232918694 | #NAME?    | down |
| 1:224365879 | 224371423 | 0.030490816 | 0.232918694 | Inf       | up   |
| 1:224952670 | 225007544 | 0.00860133  | 0.232918694 | #NAME?    | down |
| 1:235800320 | 235801097 | 0.017447766 | 0.232918694 | #NAME?    | down |
| 1:243304713 | 243330692 | 0.041720615 | 0.232918694 | #NAME?    | down |
| 1:243415702 | 243426558 | 0.004757039 | 0.232918694 | Inf       | up   |
| 1:243637611 | 243695716 | 0.003120735 | 0.232918694 | Inf       | up   |
| 10:263204   | 263658    | 0.02789972  | 0.232918694 | Inf       | up   |
| 10:1056348  | 1072293   | 0.027230449 | 0.232918694 | #NAME?    | down |
| 10:4830675  | 4847299   | 0.030966116 | 0.232918694 | Inf       | up   |
| 10:4830675  | 4909606   | 0.001171049 | 0.232918694 | #NAME?    | down |
| 10:4929656  | 4933330   | 0.011941029 | 0.232918694 | Inf       | up   |
| 10:5699525  | 5699737   | 0.028874322 | 0.232918694 | Inf       | up   |
| 10:5956379  | 5960567   | 0.048897545 | 0.232918694 | Inf       | up   |
| 10:11936545 | 11952249  | 0.01052685  | 0.232918694 | Inf       | up   |
| 10:13663453 | 13670528  | 0.049061402 | 0.232918694 | Inf       | up   |
| 10:14928016 | 14935564  | 0.025191158 | 0.232918694 | Inf       | up   |
| 10:15833630 | 15847943  | 0.016283299 | 0.232918694 | 2.9155279 | up   |
| 10:17688027 | 17695241  | 0.049933857 | 0.232918694 | Inf       | up   |
| 10:20957731 | 20961779  | 0.014240517 | 0.232918694 | #NAME?    | down |
| 10:24380869 | 24384423  | 0.048948141 | 0.232918694 | #NAME?    | down |
| 10:28595733 | 28608431  | 0.006738517 | 0.232918694 | Inf       | up   |
| 10:30026103 | 30029866  | 0.000132191 | 0.160448253 | #NAME?    | down |
| 10:31355144 | 31387798  | 0.011878899 | 0.232918694 | #NAME?    | down |
| 10:31355147 | 31387266  | 0.018527407 | 0.232918694 | Inf       | up   |
| 10:31461037 | 31502509  | 0.033855869 | 0.232918694 | Inf       | up   |
| 10:32034690 | 32037607  | 0.001993803 | 0.232918694 | Inf       | up   |
| 10:35013699 | 35031619  | 0.009493095 | 0.232918694 | Inf       | up   |
| 10:43154897 | 43158931  | 0.036790044 | 0.232918694 | Inf       | up   |
| 10:50460673 | 50519921  | 0.015220246 | 0.232918694 | Inf       | up   |
| 10:50519831 | 50598823  | 0.004722393 | 0.232918694 | Inf       | up   |
| 10:68363590 | 68364113  | 0.010213164 | 0.232918694 | #NAME?    | down |
| 10:68737845 | 68747566  | 0.045708856 | 0.232918694 | #NAME?    | down |
| 10:74070670 | 74074903  | 0.001394798 | 0.232918694 | Inf       | up   |

|              |           |             |             |            |      |
|--------------|-----------|-------------|-------------|------------|------|
| 10:79118915  | 79162133  | 0.045472857 | 0.232918694 | Inf        | up   |
| 10:86443275  | 86446449  | 0.041813095 | 0.232918694 | Inf        | up   |
| 10:86453220  | 86460496  | 0.035790287 | 0.232918694 | Inf        | up   |
| 10:86517571  | 86518091  | 0.01392825  | 0.232918694 | Inf        | up   |
| 10:87508336  | 87513221  | 0.042215515 | 0.232918694 | Inf        | up   |
| 10:87508336  | 87521169  | 0.021499731 | 0.232918694 | 2.94820224 | up   |
| 10:89751346  | 89762835  | 0.000195611 | 0.192998461 | Inf        | up   |
| 10:91994535  | 92008275  | 0.030408989 | 0.232918694 | #NAME?     | down |
| 10:92531748  | 92537550  | 0.046098031 | 0.232918694 | Inf        | up   |
| 10:96544076  | 96565426  | 0.000228476 | 0.210395709 | Inf        | up   |
| 10:96907265  | 96907747  | 0.006632945 | 0.232918694 | 2.31465782 | up   |
| 10:96949008  | 96952196  | 0.030301905 | 0.232918694 | Inf        | up   |
| 10:100937402 | 100944128 | 0.049872401 | 0.232918694 | Inf        | up   |
| 10:101672915 | 101676436 | 0.030871882 | 0.232918694 | Inf        | up   |
| 10:102358039 | 102359435 | 0.043622821 | 0.232918694 | #NAME?     | down |
| 10:118729295 | 118730410 | 0.040741065 | 0.232918694 | Inf        | up   |
| 10:124408542 | 124412200 | 0.031700923 | 0.232918694 | Inf        | up   |
| 10:126970702 | 127000307 | 0.026418771 | 0.232918694 | #NAME?     | down |
| 10:126996748 | 127000307 | 0.026849027 | 0.232918694 | Inf        | up   |
| 10:131934458 | 131947791 | 0.048205255 | 0.232918694 | Inf        | up   |
| 10:131943968 | 131945459 | 0.014423203 | 0.232918694 | Inf        | up   |
| 11:581492    | 587464    | 0.007204218 | 0.232918694 | Inf        | up   |
| 11:9989497   | 10002689  | 0.047250839 | 0.232918694 | Inf        | up   |
| 11:14771937  | 14789242  | 0.031998956 | 0.232918694 | #NAME?     | down |
| 11:16183886  | 16186955  | 0.034526074 | 0.232918694 | Inf        | up   |
| 11:17336960  | 17337534  | 0.024917074 | 0.232918694 | #NAME?     | down |
| 11:20395803  | 20397721  | 0.038966402 | 0.232918694 | #NAME?     | down |
| 11:28211062  | 28233585  | 0.027372609 | 0.232918694 | Inf        | up   |
| 11:33338757  | 33341686  | 0.023129215 | 0.232918694 | Inf        | up   |
| 11:34957384  | 34992379  | 0.020340081 | 0.232918694 | Inf        | up   |
| 11:47630555  | 47631087  | 0.049537485 | 0.232918694 | Inf        | up   |
| 11:47752916  | 47754664  | 0.002751286 | 0.232918694 | Inf        | up   |
| 11:57152640  | 57194765  | 0.03870907  | 0.232918694 | #NAME?     | down |
| 11:61366045  | 61367998  | 0.016382753 | 0.232918694 | Inf        | up   |
| 11:68185781  | 68190152  | 0.042242568 | 0.232918694 | Inf        | up   |
| 11:72984088  | 73083740  | 0.012221031 | 0.232918694 | Inf        | up   |
| 11:74810184  | 74817714  | 0.033107244 | 0.232918694 | Inf        | up   |
| 11:76513386  | 76528466  | 0.003100963 | 0.232918694 | #NAME?     | down |
| 11:77622500  | 77629899  | 0.02080883  | 0.232918694 | Inf        | up   |
| 11:77691159  | 77693611  | 0.030984364 | 0.232918694 | Inf        | up   |
| 11:85974708  | 85981228  | 0.026775825 | 0.232918694 | Inf        | up   |
| 11:86026292  | 86031611  | 0.047380617 | 0.232918694 | Inf        | up   |
| 11:89400017  | 89402542  | 0.007946117 | 0.232918694 | Inf        | up   |
| 11:95812932  | 95818904  | 0.030804887 | 0.232918694 | Inf        | up   |
| 11:108258986 | 108267342 | 0.022722611 | 0.232918694 | #NAME?     | down |
| 11:114063211 | 114187038 | 0.044813441 | 0.232918694 | Inf        | up   |
| 11:120431771 | 120437382 | 0.006905944 | 0.232918694 | Inf        | up   |
| 11:128768118 | 128772985 | 0.000354908 | 0.232918694 | Inf        | up   |
| 11:128768118 | 128782023 | 0.004823176 | 0.232918694 | 3.57835484 | up   |
| 12:829062    | 829944    | 0.024281037 | 0.232918694 | 2.18430849 | up   |
| 12:1180540   | 1190052   | 0.003287977 | 0.232918694 | #NAME?     | down |

|              |           |             |             |            |      |
|--------------|-----------|-------------|-------------|------------|------|
| 12:5799507   | 5854141   | 0.033218009 | 0.232918694 | Inf        | up   |
| 12:6655638   | 6656798   | 0.009790826 | 0.232918694 | Inf        | up   |
| 12:8943405   | 8943910   | 0.045757154 | 0.232918694 | Inf        | up   |
| 12:11034782  | 11121180  | 0.027622894 | 0.232918694 | #NAME?     | down |
| 12:24213343  | 24249916  | 0.015578422 | 0.232918694 | Inf        | up   |
| 12:25079244  | 25083493  | 0.044952562 | 0.232918694 | Inf        | up   |
| 12:28305649  | 28391411  | 0.007620056 | 0.232918694 | #NAME?     | down |
| 12:31392267  | 31392696  | 0.047576437 | 0.232918694 | Inf        | up   |
| 12:32708153  | 32713371  | 0.036059782 | 0.232918694 | Inf        | up   |
| 12:32713209  | 32718763  | 0.02080789  | 0.232918694 | Inf        | up   |
| 12:47104113  | 47108164  | 0.039794913 | 0.232918694 | -2.0106496 | down |
| 12:48074324  | 48074793  | 0.004903028 | 0.232918694 | #NAME?     | down |
| 12:50430495  | 50454417  | 0.009949191 | 0.232918694 | Inf        | up   |
| 12:50780140  | 50809589  | 0.003991632 | 0.232918694 | Inf        | up   |
| 12:50814010  | 50814439  | 0.010648468 | 0.232918694 | #NAME?     | down |
| 12:51291591  | 51299714  | 0.021448533 | 0.232918694 | #NAME?     | down |
| 12:53459272  | 53468832  | 0.046369455 | 0.232918694 | Inf        | up   |
| 12:56670275  | 56673065  | 0.023155236 | 0.232918694 | #NAME?     | down |
| 12:57395749  | 57398198  | 0.023645227 | 0.232918694 | #NAME?     | down |
| 12:62484170  | 62501698  | 0.042923087 | 0.232918694 | #NAME?     | down |
| 12:68713865  | 68714753  | 0.031991423 | 0.232918694 | Inf        | up   |
| 12:68715627  | 68727389  | 0.041603427 | 0.232918694 | Inf        | up   |
| 12:79817394  | 79822190  | 0.038149432 | 0.232918694 | Inf        | up   |
| 12:88148288  | 88176319  | 0.046074587 | 0.232918694 | Inf        | up   |
| 12:89459638  | 89472275  | 0.023411706 | 0.232918694 | Inf        | up   |
| 12:89466770  | 89472275  | 0.018898805 | 0.232918694 | Inf        | up   |
| 12:94169153  | 94186473  | 0.001175768 | 0.232918694 | #NAME?     | down |
| 12:94220016  | 94227235  | 0.0094116   | 0.232918694 | #NAME?     | down |
| 12:94254787  | 94282401  | 0.044904311 | 0.232918694 | Inf        | up   |
| 12:95152811  | 95152993  | 0.032756296 | 0.232918694 | Inf        | up   |
| 12:95208843  | 95211267  | 0.002381434 | 0.232918694 | #NAME?     | down |
| 12:101396399 | 101405981 | 0.024035517 | 0.232918694 | #NAME?     | down |
| 12:101714090 | 101716812 | 0.031364573 | 0.232918694 | Inf        | up   |
| 12:101897863 | 101901433 | 0.044580044 | 0.232918694 | #NAME?     | down |
| 12:109101902 | 109103611 | 0.025998893 | 0.232918694 | #NAME?     | down |
| 12:111482787 | 111486824 | 0.009308953 | 0.232918694 | Inf        | up   |
| 12:111485265 | 111486824 | 0.04210154  | 0.232918694 | Inf        | up   |
| 12:111552280 | 111555919 | 0.015490551 | 0.232918694 | Inf        | up   |
| 12:112178931 | 112179397 | 0.01577431  | 0.232918694 | Inf        | up   |
| 12:112477651 | 112478015 | 0.041222404 | 0.232918694 | #NAME?     | down |
| 12:116236821 | 116237705 | 0.012710151 | 0.232918694 | #NAME?     | down |
| 12:120510017 | 120516788 | 0.00451414  | 0.232918694 | Inf        | up   |
| 12:122216488 | 122224644 | 0.049348408 | 0.232918694 | Inf        | up   |
| 12:122327947 | 122328426 | 0.021652284 | 0.232918694 | #NAME?     | down |
| 12:123160781 | 123203375 | 0.029196013 | 0.232918694 | Inf        | up   |
| 12:123194386 | 123198334 | 0.047470269 | 0.232918694 | Inf        | up   |
| 12:124419957 | 124430781 | 0.0097332   | 0.232918694 | #NAME?     | down |
| 12:131992173 | 132006302 | 0.032242992 | 0.232918694 | Inf        | up   |
| 13:20596150  | 20615879  | 0.04959987  | 0.232918694 | Inf        | up   |
| 13:21167988  | 21172681  | 0.028574202 | 0.232918694 | Inf        | up   |
| 13:21301419  | 21301618  | 0.007323437 | 0.232918694 | #NAME?     | down |

|              |           |             |             |            |      |
|--------------|-----------|-------------|-------------|------------|------|
| 13:21391722  | 21425678  | 0.024890373 | 0.232918694 | Inf        | up   |
| 13:24498116  | 24501834  | 0.047424042 | 0.232918694 | Inf        | up   |
| 13:28260447  | 28261458  | 0.003367622 | 0.232918694 | 8.95340672 | up   |
| 13:30231314  | 30283791  | 0.048056577 | 0.232918694 | Inf        | up   |
| 13:32480590  | 32527532  | 0.00212861  | 0.232918694 | #NAME?     | down |
| 13:32648754  | 32652007  | 0.041469559 | 0.232918694 | #NAME?     | down |
| 13:37029765  | 37051583  | 0.011226716 | 0.232918694 | #NAME?     | down |
| 13:37040405  | 37051583  | 0.022744646 | 0.232918694 | Inf        | up   |
| 13:40559509  | 40560860  | 0.049220665 | 0.232918694 | Inf        | up   |
| 13:40940921  | 40943925  | 0.04477609  | 0.232918694 | 4.90211361 | up   |
| 13:41252645  | 41254620  | 0.039678067 | 0.232918694 | #NAME?     | down |
| 13:42159266  | 42160136  | 0.019784399 | 0.232918694 | #NAME?     | down |
| 13:45516143  | 45525051  | 0.004639415 | 0.232918694 | #NAME?     | down |
| 13:48256177  | 48258236  | 0.034468869 | 0.232918694 | Inf        | up   |
| 13:48342599  | 48349023  | 0.010768793 | 0.232918694 | Inf        | up   |
| 13:52417992  | 52427219  | 0.000376833 | 0.232918694 | Inf        | up   |
| 13:52658099  | 52659249  | 0.038556434 | 0.232918694 | Inf        | up   |
| 13:100425633 | 100449305 | 0.018046231 | 0.232918694 | Inf        | up   |
| 13:100668579 | 100670569 | 0.040966042 | 0.232918694 | Inf        | up   |
| 13:109560401 | 109571158 | 0.046277279 | 0.232918694 | Inf        | up   |
| 13:112565111 | 112571114 | 0.042268489 | 0.232918694 | Inf        | up   |
| 14:20395450  | 20395949  | 0.029501168 | 0.232918694 | #NAME?     | down |
| 14:22906195  | 22913845  | 0.041203045 | 0.232918694 | Inf        | up   |
| 14:24211411  | 24211829  | 0.033172103 | 0.232918694 | Inf        | up   |
| 14:37110827  | 37123342  | 0.04382294  | 0.232918694 | Inf        | up   |
| 14:39154211  | 39159550  | 0.028913378 | 0.232918694 | Inf        | up   |
| 14:49723874  | 49725769  | 0.000443991 | 0.232918694 | #NAME?     | down |
| 14:50741582  | 50744365  | 0.04836423  | 0.232918694 | Inf        | up   |
| 14:54702062  | 54702580  | 0.011055574 | 0.232918694 | Inf        | up   |
| 14:60796217  | 60818847  | 0.006413148 | 0.232918694 | #NAME?     | down |
| 14:61443111  | 61457679  | 0.013376208 | 0.232918694 | #NAME?     | down |
| 14:71413948  | 71529370  | 0.003283683 | 0.232918694 | #NAME?     | down |
| 14:73107826  | 73109492  | 0.043308789 | 0.232918694 | Inf        | up   |
| 14:91797785  | 91802421  | 0.019932988 | 0.232918694 | #NAME?     | down |
| 14:92070935  | 92081061  | 0.002719984 | 0.232918694 | #NAME?     | down |
| 14:92093252  | 92096838  | 0.025310268 | 0.232918694 | Inf        | up   |
| 14:92555751  | 92577477  | 0.001870129 | 0.232918694 | #NAME?     | down |
| 14:92810254  | 92811754  | 0.042950866 | 0.232918694 | Inf        | up   |
| 14:93016676  | 93076619  | 0.041913175 | 0.232918694 | #NAME?     | down |
| 14:96560649  | 96565214  | 0.005390428 | 0.232918694 | Inf        | up   |
| 14:103008472 | 103012188 | 0.0060332   | 0.232918694 | Inf        | up   |
| 14:103451918 | 103462461 | 0.042532086 | 0.232918694 | #NAME?     | down |
| 14:103746373 | 103754244 | 0.049795379 | 0.232918694 | Inf        | up   |
| 15:24975358  | 24977029  | 0.011413153 | 0.232918694 | Inf        | up   |
| 15:28292888  | 28312874  | 0.031873355 | 0.232918694 | #NAME?     | down |
| 15:40985338  | 40987974  | 0.03794069  | 0.232918694 | Inf        | up   |
| 15:41085369  | 41087682  | 0.040365671 | 0.232918694 | #NAME?     | down |
| 15:42559339  | 42563857  | 0.045617856 | 0.232918694 | Inf        | up   |
| 15:44595259  | 44596943  | 0.022754337 | 0.232918694 | Inf        | up   |
| 15:44626331  | 44629388  | 0.043026447 | 0.232918694 | Inf        | up   |
| 15:49137150  | 49139653  | 0.046717739 | 0.232918694 | Inf        | up   |

|             |          |             |             |            |      |
|-------------|----------|-------------|-------------|------------|------|
| 15:50300789 | 50309798 | 0.002491033 | 0.232918694 | Inf        | up   |
| 15:56394165 | 56394834 | 0.005912174 | 0.232918694 | Inf        | up   |
| 15:57091789 | 57095163 | 0.026396538 | 0.232918694 | Inf        | up   |
| 15:58912563 | 58919972 | 0.049651077 | 0.232918694 | Inf        | up   |
| 15:58913499 | 58916999 | 0.034993869 | 0.232918694 | #NAME?     | down |
| 15:59671183 | 59680308 | 0.024074286 | 0.232918694 | Inf        | up   |
| 15:62033441 | 62044255 | 0.029774304 | 0.232918694 | #NAME?     | down |
| 15:63532647 | 63563008 | 0.005214643 | 0.232918694 | #NAME?     | down |
| 15:63686359 | 63689699 | 0.025004857 | 0.232918694 | Inf        | up   |
| 15:63693964 | 63694894 | 0.046064485 | 0.232918694 | Inf        | up   |
| 15:63774694 | 63775649 | 0.034823636 | 0.232918694 | Inf        | up   |
| 15:64112573 | 64123546 | 0.030955531 | 0.232918694 | Inf        | up   |
| 15:65729072 | 65756472 | 0.001880808 | 0.232918694 | #NAME?     | down |
| 15:66535933 | 66546705 | 0.013138616 | 0.232918694 | Inf        | up   |
| 15:67231814 | 67236820 | 0.040573467 | 0.232918694 | Inf        | up   |
| 15:72555271 | 72567177 | 0.04640373  | 0.232918694 | Inf        | up   |
| 15:75407055 | 75414311 | 0.020211244 | 0.232918694 | Inf        | up   |
| 15:75854386 | 75873568 | 0.002200649 | 0.232918694 | Inf        | up   |
| 15:75859878 | 75883424 | 0.005484027 | 0.232918694 | Inf        | up   |
| 15:76292431 | 76295737 | 0.021321373 | 0.232918694 | Inf        | up   |
| 15:78289619 | 78290575 | 0.03864058  | 0.232918694 | Inf        | up   |
| 15:78470532 | 78471924 | 0.027017635 | 0.232918694 | Inf        | up   |
| 15:78544869 | 78545764 | 0.033063359 | 0.232918694 | Inf        | up   |
| 15:78891484 | 78892313 | 0.016167174 | 0.232918694 | Inf        | up   |
| 15:80098416 | 80122800 | 0.02252585  | 0.232918694 | #NAME?     | down |
| 15:85113873 | 85117839 | 0.021523938 | 0.232918694 | Inf        | up   |
| 15:85684741 | 85693451 | 0.000414212 | 0.232918694 | Inf        | up   |
| 15:90638446 | 90641199 | 0.017489723 | 0.232918694 | #NAME?     | down |
| 15:92885515 | 92892072 | 0.03253428  | 0.232918694 | Inf        | up   |
| 15:93000512 | 93004751 | 0.020888009 | 0.232918694 | #NAME?     | down |
| 15:93000512 | 93014909 | 0.004328487 | 0.232918694 | Inf        | up   |
| 16:1724557  | 1729578  | 0.006898906 | 0.232918694 | Inf        | up   |
| 16:1822300  | 1823037  | 0.024963874 | 0.232918694 | #NAME?     | down |
| 16:3979116  | 3983440  | 0.049208872 | 0.232918694 | Inf        | up   |
| 16:11841695 | 11842000 | 0.038134254 | 0.232918694 | Inf        | up   |
| 16:11894954 | 11896785 | 0.007785123 | 0.232918694 | #NAME?     | down |
| 16:14627106 | 14627336 | 0.031802827 | 0.232918694 | 4.69081348 | up   |
| 16:16007816 | 16036603 | 0.035719935 | 0.232918694 | Inf        | up   |
| 16:24750726 | 24758599 | 0.049461038 | 0.232918694 | #NAME?     | down |
| 16:27346467 | 27355907 | 0.047107923 | 0.232918694 | Inf        | up   |
| 16:27476451 | 27486154 | 0.046908089 | 0.232918694 | Inf        | up   |
| 16:30483827 | 30484263 | 0.019005356 | 0.232918694 | -0.9131805 | down |
| 16:30800205 | 30802470 | 0.031985411 | 0.232918694 | Inf        | up   |
| 16:47497399 | 47547548 | 0.012429504 | 0.232918694 | #NAME?     | down |
| 16:49730771 | 49731461 | 0.040652727 | 0.232918694 | Inf        | up   |
| 16:53267294 | 53268126 | 0.013995694 | 0.232918694 | #NAME?     | down |
| 16:53873786 | 53888951 | 0.009938861 | 0.232918694 | #NAME?     | down |
| 16:58599236 | 58599511 | 0.008510147 | 0.232918694 | Inf        | up   |
| 16:68249290 | 68252653 | 0.03370853  | 0.232918694 | #NAME?     | down |
| 16:70258980 | 70262524 | 0.002490704 | 0.232918694 | #NAME?     | down |
| 16:71738942 | 71739341 | 0.026474535 | 0.232918694 | #NAME?     | down |

|             |          |             |             |            |      |
|-------------|----------|-------------|-------------|------------|------|
| 16:72088987 | 72090786 | 0.017957373 | 0.232918694 | #NAME?     | down |
| 16:84979189 | 84981994 | 0.04966905  | 0.232918694 | Inf        | up   |
| 16:87748673 | 87762040 | 0.028680302 | 0.232918694 | #NAME?     | down |
| 16:88033109 | 88038011 | 7.06E-06    | 0.048743511 | #NAME?     | down |
| 17:1361092  | 1362008  | 0.02998681  | 0.232918694 | Inf        | up   |
| 17:2394043  | 2395454  | 0.018038472 | 0.232918694 | Inf        | up   |
| 17:5308694  | 5332152  | 0.037007656 | 0.232918694 | Inf        | up   |
| 17:5308694  | 5346925  | 0.020323002 | 0.232918694 | #NAME?     | down |
| 17:5354359  | 5365238  | 0.010430954 | 0.232918694 | Inf        | up   |
| 17:8893586  | 8911507  | 0.018294916 | 0.232918694 | #NAME?     | down |
| 17:21006896 | 21011309 | 0.028452767 | 0.232918694 | Inf        | up   |
| 17:29502589 | 29510992 | 0.047989661 | 0.232918694 | Inf        | up   |
| 17:29648144 | 29672129 | 0.014198516 | 0.232918694 | #NAME?     | down |
| 17:30481143 | 30492753 | 0.049795379 | 0.232918694 | Inf        | up   |
| 17:31223444 | 31227606 | 0.038756852 | 0.232918694 | #NAME?     | down |
| 17:31885980 | 31887313 | 0.049194305 | 0.232918694 | Inf        | up   |
| 17:37576341 | 37585430 | 0.027720044 | 0.232918694 | -3.6011097 | down |
| 17:37584648 | 37586549 | 0.003116762 | 0.232918694 | #NAME?     | down |
| 17:39423327 | 39424738 | 0.042700321 | 0.232918694 | Inf        | up   |
| 17:40395449 | 40399131 | 0.011275889 | 0.232918694 | Inf        | up   |
| 17:44083545 | 44083854 | 0.040869243 | 0.232918694 | Inf        | up   |
| 17:46170855 | 46172232 | 0.043984515 | 0.232918694 | Inf        | up   |
| 17:47154672 | 47158303 | 0.004779773 | 0.232918694 | Inf        | up   |
| 17:47328269 | 47345098 | 0.049769257 | 0.232918694 | Inf        | up   |
| 17:47370437 | 47377903 | 0.018159624 | 0.232918694 | #NAME?     | down |
| 17:47742610 | 47743192 | 0.016544235 | 0.232918694 | #NAME?     | down |
| 17:50139263 | 50141373 | 0.046346677 | 0.232918694 | Inf        | up   |
| 17:56901419 | 56904488 | 0.006058611 | 0.232918694 | #NAME?     | down |
| 17:58216088 | 58216736 | 0.004396659 | 0.232918694 | Inf        | up   |
| 17:59731421 | 59735473 | 0.003722363 | 0.232918694 | #NAME?     | down |
| 17:59731421 | 59773885 | 0.00035924  | 0.232918694 | #NAME?     | down |
| 17:61984171 | 61985090 | 0.004251557 | 0.232918694 | Inf        | up   |
| 17:63792412 | 63809659 | 0.046317924 | 0.232918694 | Inf        | up   |
| 17:64171100 | 64188415 | 0.021173877 | 0.232918694 | #NAME?     | down |
| 17:65689129 | 65750724 | 0.019427942 | 0.232918694 | #NAME?     | down |
| 17:67891844 | 67894165 | 0.001110209 | 0.232918694 | #NAME?     | down |
| 17:68114422 | 68115178 | 0.015841349 | 0.232918694 | Inf        | up   |
| 17:69255543 | 69256283 | 0.011325172 | 0.232918694 | Inf        | up   |
| 17:75937566 | 75938232 | 0.040118213 | 0.232918694 | Inf        | up   |
| 17:80289659 | 80290728 | 0.037357723 | 0.232918694 | Inf        | up   |
| 17:80306252 | 80306468 | 0.048977301 | 0.232918694 | Inf        | up   |
| 17:81270525 | 81271024 | 0.000902306 | 0.232918694 | Inf        | up   |
| 18:2732265  | 2762236  | 0.026346988 | 0.232918694 | Inf        | up   |
| 18:8076455  | 8114827  | 0.010851579 | 0.232918694 | Inf        | up   |
| 18:13037237 | 13040956 | 0.026233921 | 0.232918694 | Inf        | up   |
| 18:21039472 | 21044186 | 0.00538363  | 0.232918694 | Inf        | up   |
| 18:21765772 | 21804014 | 0.036747623 | 0.232918694 | #NAME?     | down |
| 18:31638644 | 31666372 | 0.020969114 | 0.232918694 | Inf        | up   |
| 18:32111754 | 32126800 | 0.04890186  | 0.232918694 | Inf        | up   |
| 18:42015476 | 42029441 | 0.039647046 | 0.232918694 | #NAME?     | down |
| 18:42027443 | 42049605 | 7.56E-05    | 0.116074475 | Inf        | up   |

|             |          |             |             |           |      |
|-------------|----------|-------------|-------------|-----------|------|
| 18:49331864 | 49379758 | 0.041040855 | 0.232918694 | Inf       | up   |
| 18:50918110 | 50921187 | 0.040924039 | 0.232918694 | Inf       | up   |
| 18:51058125 | 51059916 | 0.021707659 | 0.232918694 | Inf       | up   |
| 18:57613602 | 57615975 | 0.04403719  | 0.232918694 | Inf       | up   |
| 18:69895701 | 69947532 | 0.040346849 | 0.232918694 | Inf       | up   |
| 18:76849526 | 76868863 | 0.049389504 | 0.232918694 | Inf       | up   |
| 18:79096476 | 79126375 | 0.024242827 | 0.232918694 | #NAME?    | down |
| 19:3623688  | 3624162  | 0.02989132  | 0.232918694 | Inf       | up   |
| 19:4418020  | 4423874  | 0.043602241 | 0.232918694 | Inf       | up   |
| 19:5641594  | 5641950  | 0.030659751 | 0.232918694 | Inf       | up   |
| 19:7938027  | 7941197  | 0.047100001 | 0.232918694 | Inf       | up   |
| 19:10163326 | 10175618 | 0.007927025 | 0.232918694 | Inf       | up   |
| 19:10168330 | 10177367 | 0.009373007 | 0.232918694 | Inf       | up   |
| 19:11724194 | 11725327 | 0.044695281 | 0.232918694 | #NAME?    | down |
| 19:16088027 | 16089120 | 0.005997326 | 0.232918694 | Inf       | up   |
| 19:18175040 | 18175697 | 0.018759241 | 0.232918694 | #NAME?    | down |
| 19:18539371 | 18539720 | 0.014650635 | 0.232918694 | Inf       | up   |
| 19:19465340 | 19474118 | 0.034471509 | 0.232918694 | -4.072132 | down |
| 19:19465345 | 19474167 | 0.00932889  | 0.232918694 | Inf       | up   |
| 19:23662114 | 23663158 | 0.015281566 | 0.232918694 | Inf       | up   |
| 19:24105940 | 24106643 | 0.038051159 | 0.232918694 | Inf       | up   |
| 19:34215124 | 34215661 | 0.03670253  | 0.232918694 | Inf       | up   |
| 19:34221507 | 34221738 | 0.042925703 | 0.232918694 | #NAME?    | down |
| 19:38343580 | 38344368 | 0.014212391 | 0.232918694 | Inf       | up   |
| 19:38585938 | 38586191 | 0.011729121 | 0.232918694 | Inf       | up   |
| 19:39392464 | 39393637 | 0.047359781 | 0.232918694 | Inf       | up   |
| 19:45263113 | 45266281 | 0.041033889 | 0.232918694 | Inf       | up   |
| 19:48149763 | 48151339 | 0.000139389 | 0.160448253 | #NAME?    | down |
| 19:50495303 | 50496608 | 0.005225792 | 0.232918694 | Inf       | up   |
| 19:54455364 | 54455567 | 0.04945269  | 0.232918694 | #NAME?    | down |
| 19:54909245 | 54910065 | 0.018739076 | 0.232918694 | Inf       | up   |
| 19:57455653 | 57467085 | 0.048523538 | 0.232918694 | Inf       | up   |
| 2:3559448   | 3559729  | 0.048600751 | 0.232918694 | Inf       | up   |
| 2:8888018   | 8958642  | 0.007987953 | 0.232918694 | Inf       | up   |
| 2:8908621   | 8958642  | 6.71E-09    | 9.27E-05    | 6.1046352 | up   |
| 2:9517901   | 9543285  | 0.04067125  | 0.232918694 | Inf       | up   |
| 2:10644320  | 10668723 | 0.044453388 | 0.232918694 | #NAME?    | down |
| 2:11455342  | 11457233 | 0.021991931 | 0.232918694 | Inf       | up   |
| 2:24026799  | 24033257 | 0.021096154 | 0.232918694 | #NAME?    | down |
| 2:24246129  | 24254431 | 0.048643413 | 0.232918694 | Inf       | up   |
| 2:25767583  | 25771540 | 0.019430114 | 0.232918694 | #NAME?    | down |
| 2:32087492  | 32089605 | 0.007851738 | 0.232918694 | Inf       | up   |
| 2:32126948  | 32137188 | 0.048676602 | 0.232918694 | Inf       | up   |
| 2:32478635  | 32482582 | 0.026636932 | 0.232918694 | Inf       | up   |
| 2:36396614  | 36442735 | 0.000545087 | 0.232918694 | #NAME?    | down |
| 2:37199704  | 37201726 | 0.047756769 | 0.232918694 | Inf       | up   |
| 2:39056702  | 39058804 | 0.026880724 | 0.232918694 | #NAME?    | down |
| 2:43912432  | 43918398 | 0.03417912  | 0.232918694 | Inf       | up   |
| 2:44490786  | 44505730 | 0.003061792 | 0.232918694 | Inf       | up   |
| 2:45413114  | 45419894 | 0.049567225 | 0.232918694 | Inf       | up   |
| 2:45546317  | 45562756 | 0.045203523 | 0.232918694 | #NAME?    | down |

|             |           |             |             |            |      |
|-------------|-----------|-------------|-------------|------------|------|
| 2:46974973  | 46978907  | 0.041222269 | 0.232918694 | Inf        | up   |
| 2:47834579  | 47834871  | 0.021365013 | 0.232918694 | Inf        | up   |
| 2:55332566  | 55335164  | 0.002476556 | 0.232918694 | Inf        | up   |
| 2:55643158  | 55644720  | 0.023051196 | 0.232918694 | Inf        | up   |
| 2:61108317  | 61118116  | 0.007420803 | 0.232918694 | #NAME?     | down |
| 2:63313248  | 63492940  | 0.014481827 | 0.232918694 | #NAME?     | down |
| 2:70224554  | 70236175  | 0.006793105 | 0.232918694 | Inf        | up   |
| 2:74167014  | 74172752  | 0.007859931 | 0.232918694 | Inf        | up   |
| 2:86121479  | 86125515  | 0.042108018 | 0.232918694 | #NAME?     | down |
| 2:86147702  | 86151520  | 0.049733902 | 0.232918694 | Inf        | up   |
| 2:88801099  | 88804880  | 0.007549015 | 0.232918694 | Inf        | up   |
| 2:95100474  | 95101723  | 0.042840888 | 0.232918694 | #NAME?     | down |
| 2:96194958  | 96195549  | 0.026308708 | 0.232918694 | Inf        | up   |
| 2:100006632 | 100008932 | 0.010588534 | 0.232918694 | #NAME?     | down |
| 2:101842609 | 101844337 | 0.043102264 | 0.232918694 | Inf        | up   |
| 2:105296356 | 105298705 | 0.021471527 | 0.232918694 | #NAME?     | down |
| 2:108451028 | 108452466 | 9.42E-05    | 0.130086575 | Inf        | up   |
| 2:109564366 | 109565859 | 0.040473386 | 0.232918694 | Inf        | up   |
| 2:111944960 | 111947567 | 0.049016219 | 0.232918694 | #NAME?     | down |
| 2:120285874 | 120289757 | 0.005087185 | 0.232918694 | Inf        | up   |
| 2:135661270 | 135680324 | 0.009203606 | 0.232918694 | Inf        | up   |
| 2:135748267 | 135761911 | 0.031715408 | 0.232918694 | Inf        | up   |
| 2:143435601 | 143556485 | 0.044162723 | 0.232918694 | Inf        | up   |
| 2:152575136 | 152581049 | 0.025145002 | 0.232918694 | #NAME?     | down |
| 2:159745770 | 159748903 | 5.31E-05    | 0.104718603 | #NAME?     | down |
| 2:171011373 | 171014948 | 0.045202392 | 0.232918694 | #NAME?     | down |
| 2:171014851 | 171028405 | 0.02931152  | 0.232918694 | Inf        | up   |
| 2:177231889 | 177234271 | 0.020056137 | 0.232918694 | Inf        | up   |
| 2:181481598 | 181485992 | 0.007217566 | 0.232918694 | Inf        | up   |
| 2:182952405 | 182953331 | 0.003451114 | 0.232918694 | #NAME?     | down |
| 2:183128287 | 183130545 | 0.016856089 | 0.232918694 | Inf        | up   |
| 2:196139620 | 196146055 | 0.040885246 | 0.232918694 | Inf        | up   |
| 2:196154968 | 196163427 | 0.047653995 | 0.232918694 | Inf        | up   |
| 2:200856682 | 200856985 | 0.040290823 | 0.232918694 | 2.88220461 | up   |
| 2:205158722 | 205193320 | 0.049905783 | 0.232918694 | Inf        | up   |
| 2:208345111 | 208348023 | 3.96E-05    | 0.091475138 | Inf        | up   |
| 2:214767482 | 214792445 | 0.035728921 | 0.232918694 | #NAME?     | down |
| 2:226864604 | 226908878 | 0.002227407 | 0.232918694 | Inf        | up   |
| 2:229858772 | 229880128 | 0.006092704 | 0.232918694 | Inf        | up   |
| 2:230440476 | 230450255 | 0.042157245 | 0.232918694 | #NAME?     | down |
| 2:238173534 | 238185287 | 0.01658696  | 0.232918694 | Inf        | up   |
| 2:239126456 | 239156773 | 0.004675423 | 0.232918694 | #NAME?     | down |
| 2:241654546 | 241668685 | 0.044389876 | 0.232918694 | Inf        | up   |
| 20:9096287  | 9217452   | 0.030065206 | 0.232918694 | Inf        | up   |
| 20:9337126  | 9339037   | 0.0244537   | 0.232918694 | Inf        | up   |
| 20:18297985 | 18306393  | 0.039502683 | 0.232918694 | #NAME?     | down |
| 20:21326490 | 21330539  | 0.039238828 | 0.232918694 | Inf        | up   |
| 20:31527484 | 31528050  | 0.002445958 | 0.232918694 | #NAME?     | down |
| 20:34470048 | 34481206  | 0.034090774 | 0.232918694 | #NAME?     | down |
| 20:35858302 | 35871829  | 0.031800167 | 0.232918694 | #NAME?     | down |
| 20:35863013 | 35871829  | 0.026725039 | 0.232918694 | #NAME?     | down |

|             |           |             |             |            |      |
|-------------|-----------|-------------|-------------|------------|------|
| 20:37061103 | 37062270  | 0.016964652 | 0.232918694 | #NAME?     | down |
| 20:44972078 | 44987296  | 0.047274478 | 0.232918694 | Inf        | up   |
| 20:45000392 | 45001353  | 0.001658267 | 0.232918694 | #NAME?     | down |
| 20:47262288 | 47276795  | 0.00265097  | 0.232918694 | #NAME?     | down |
| 20:48688657 | 48691096  | 0.049340933 | 0.232918694 | Inf        | up   |
| 20:48690947 | 48692790  | 0.001010351 | 0.232918694 | Inf        | up   |
| 20:49074785 | 49077064  | 0.045499963 | 0.232918694 | #NAME?     | down |
| 20:51516784 | 51523596  | 0.036832614 | 0.232918694 | #NAME?     | down |
| 20:62854016 | 62857635  | 0.036455304 | 0.232918694 | Inf        | up   |
| 21:43686804 | 43688240  | 0.024655861 | 0.232918694 | Inf        | up   |
| 21:43998254 | 43998544  | 0.011523859 | 0.232918694 | #NAME?     | down |
| 22:18126354 | 18127034  | 0.005968682 | 0.232918694 | Inf        | up   |
| 22:21799012 | 21807846  | 0.02450622  | 0.232918694 | #NAME?     | down |
| 22:28844127 | 28846512  | 0.044307705 | 0.232918694 | #NAME?     | down |
| 22:30932889 | 30958694  | 0.045427563 | 0.232918694 | Inf        | up   |
| 22:37623327 | 37623633  | 0.015744389 | 0.232918694 | #NAME?     | down |
| 22:40156115 | 40251200  | 0.020350661 | 0.232918694 | Inf        | up   |
| 22:40273425 | 40285770  | 0.045342139 | 0.232918694 | Inf        | up   |
| 22:40840626 | 40850880  | 0.034391128 | 0.232918694 | #NAME?     | down |
| 22:41338313 | 41339191  | 0.001255079 | 0.232918694 | Inf        | up   |
| 22:41808875 | 41810291  | 0.00697824  | 0.232918694 | Inf        | up   |
| 22:45178238 | 45178900  | 0.028746525 | 0.232918694 | #NAME?     | down |
| 22:46997634 | 47037198  | 0.018123719 | 0.232918694 | Inf        | up   |
| 3:4449266   | 4453049   | 0.031438706 | 0.232918694 | #NAME?     | down |
| 3:15685226  | 15686309  | 0.033443183 | 0.232918694 | Inf        | up   |
| 3:27437388  | 27448797  | 0.000424379 | 0.232918694 | Inf        | up   |
| 3:32733423  | 32737490  | 0.041820152 | 0.232918694 | Inf        | up   |
| 3:33412722  | 33425741  | 0.049390042 | 0.232918694 | Inf        | up   |
| 3:37063742  | 37083806  | 0.044103852 | 0.232918694 | Inf        | up   |
| 3:37083636  | 37096660  | 0.04628631  | 0.232918694 | Inf        | up   |
| 3:37121492  | 37129149  | 0.032350631 | 0.232918694 | #NAME?     | down |
| 3:40461407  | 40461661  | 0.021281462 | 0.232918694 | #NAME?     | down |
| 3:47610066  | 47678311  | 0.006080615 | 0.232918694 | Inf        | up   |
| 3:47686049  | 47693300  | 0.011252214 | 0.232918694 | Inf        | up   |
| 3:47720666  | 47736126  | 0.014241597 | 0.232918694 | Inf        | up   |
| 3:49324702  | 49325845  | 0.003852601 | 0.232918694 | #NAME?     | down |
| 3:52943353  | 52954411  | 0.023557803 | 0.232918694 | Inf        | up   |
| 3:56627037  | 56628614  | 0.003228757 | 0.232918694 | 6.36350719 | up   |
| 3:56668397  | 56673725  | 0.028758449 | 0.232918694 | Inf        | up   |
| 3:67495798  | 67498295  | 0.04789577  | 0.232918694 | Inf        | up   |
| 3:71690010  | 71699708  | 0.0483455   | 0.232918694 | -0.8857506 | down |
| 3:71693875  | 71699708  | 0.026135368 | 0.232918694 | Inf        | up   |
| 3:114500352 | 114565436 | 0.040201764 | 0.232918694 | Inf        | up   |
| 3:119500695 | 119517315 | 3.97E-05    | 0.091475138 | #NAME?     | down |
| 3:122362968 | 122365466 | 0.021726892 | 0.232918694 | Inf        | up   |
| 3:128262128 | 128264781 | 0.002236938 | 0.232918694 | Inf        | up   |
| 3:132474932 | 132478140 | 0.044310168 | 0.232918694 | Inf        | up   |
| 3:138621407 | 138622416 | 0.036581116 | 0.232918694 | #NAME?     | down |
| 3:141509568 | 141540609 | 0.035625425 | 0.232918694 | Inf        | up   |
| 3:141512163 | 141540609 | 0.044063426 | 0.232918694 | Inf        | up   |
| 3:149846011 | 149872154 | 0.047670112 | 0.232918694 | Inf        | up   |

|             |           |             |             |            |      |
|-------------|-----------|-------------|-------------|------------|------|
| 3:149895473 | 149921227 | 0.02455001  | 0.232918694 | Inf        | up   |
| 3:153164766 | 153247531 | 0.04558676  | 0.232918694 | #NAME?     | down |
| 3:160411920 | 160414517 | 0.038740999 | 0.232918694 | Inf        | up   |
| 3:168036836 | 168041474 | 0.028091164 | 0.232918694 | Inf        | up   |
| 3:170113360 | 170136665 | 0.030033352 | 0.232918694 | #NAME?     | down |
| 3:170128684 | 170149244 | 0.03948997  | 0.232918694 | #NAME?     | down |
| 3:170145423 | 170178938 | 0.011057959 | 0.232918694 | #NAME?     | down |
| 3:172251260 | 172298787 | 0.037229203 | 0.232918694 | Inf        | up   |
| 3:182961226 | 182965753 | 0.025416324 | 0.232918694 | Inf        | up   |
| 3:183086693 | 183092545 | 0.038085079 | 0.232918694 | Inf        | up   |
| 3:183205876 | 183207823 | 0.010733723 | 0.232918694 | Inf        | up   |
| 3:183643480 | 183651276 | 0.008715005 | 0.232918694 | #NAME?     | down |
| 3:195291706 | 195308837 | 0.04596421  | 0.232918694 | Inf        | up   |
| 3:195295708 | 195302174 | 0.028686119 | 0.232918694 | Inf        | up   |
| 3:195301575 | 195302174 | 0.046561747 | 0.232918694 | Inf        | up   |
| 3:195333028 | 195357784 | 0.040856546 | 0.232918694 | Inf        | up   |
| 3:195516842 | 195524896 | 0.007560178 | 0.232918694 | #NAME?     | down |
| 3:196806579 | 196812851 | 0.001512985 | 0.232918694 | #NAME?     | down |
| 3:197830770 | 197839397 | 0.032459349 | 0.232918694 | #NAME?     | down |
| 3:197865423 | 197866219 | 0.014394856 | 0.232918694 | -5.3392127 | down |
| 3:197866112 | 197871462 | 0.001108775 | 0.232918694 | #NAME?     | down |
| 4:2954424   | 2956811   | 0.019577582 | 0.232918694 | #NAME?     | down |
| 4:15816511  | 15825016  | 0.019899496 | 0.232918694 | Inf        | up   |
| 4:25154998  | 25159107  | 0.013290121 | 0.232918694 | #NAME?     | down |
| 4:40144632  | 40154267  | 0.046718598 | 0.232918694 | Inf        | up   |
| 4:40890364  | 40935139  | 0.038871763 | 0.232918694 | Inf        | up   |
| 4:41013583  | 41014398  | 0.015947029 | 0.232918694 | #NAME?     | down |
| 4:42503450  | 42507154  | 0.039507808 | 0.232918694 | #NAME?     | down |
| 4:42503450  | 42524847  | 0.001706504 | 0.232918694 | Inf        | up   |
| 4:42503450  | 42543986  | 0.022434562 | 0.232918694 | Inf        | up   |
| 4:48642277  | 48646017  | 0.039478166 | 0.232918694 | Inf        | up   |
| 4:51863437  | 51899378  | 0.036535315 | 0.232918694 | #NAME?     | down |
| 4:53414615  | 53444103  | 0.031633041 | 0.232918694 | Inf        | up   |
| 4:53425872  | 53453133  | 0.025964294 | 0.232918694 | Inf        | up   |
| 4:56011412  | 56011985  | 0.006133266 | 0.232918694 | #NAME?     | down |
| 4:67798639  | 67824295  | 0.048270207 | 0.232918694 | Inf        | up   |
| 4:71486948  | 71497692  | 0.008749341 | 0.232918694 | #NAME?     | down |
| 4:77058507  | 77066405  | 0.008710402 | 0.232918694 | #NAME?     | down |
| 4:82824555  | 82827632  | 0.03280205  | 0.232918694 | #NAME?     | down |
| 4:82871944  | 82875822  | 0.013851956 | 0.232918694 | Inf        | up   |
| 4:83446835  | 83448961  | 0.039756518 | 0.232918694 | Inf        | up   |
| 4:88419302  | 88420428  | 0.008161586 | 0.232918694 | #NAME?     | down |
| 4:99028867  | 99048876  | 0.024130837 | 0.232918694 | Inf        | up   |
| 4:105396249 | 105424322 | 0.043498692 | 0.232918694 | #NAME?     | down |
| 4:118088039 | 118114960 | 0.014760606 | 0.232918694 | #NAME?     | down |
| 4:127921524 | 127939997 | 0.039693211 | 0.232918694 | Inf        | up   |
| 4:143221175 | 143227030 | 0.049086519 | 0.232918694 | Inf        | up   |
| 4:151174670 | 151187463 | 0.004969084 | 0.232918694 | #NAME?     | down |
| 4:152953499 | 152954319 | 0.015686515 | 0.232918694 | #NAME?     | down |
| 4:153626147 | 153632838 | 0.008174671 | 0.232918694 | #NAME?     | down |
| 4:155774968 | 155777642 | 0.003155969 | 0.232918694 | Inf        | up   |

|             |           |             |             |            |      |
|-------------|-----------|-------------|-------------|------------|------|
| 4:159238809 | 159243791 | 0.041488309 | 0.232918694 | Inf        | up   |
| 5:6604138   | 6605408   | 0.016067729 | 0.232918694 | #NAME?     | down |
| 5:34818797  | 34821850  | 0.049342304 | 0.232918694 | Inf        | up   |
| 5:37114960  | 37120340  | 0.038943026 | 0.232918694 | Inf        | up   |
| 5:37213559  | 37224740  | 0.038871763 | 0.232918694 | Inf        | up   |
| 5:43675511  | 43677806  | 0.024359699 | 0.232918694 | 2.68028285 | up   |
| 5:43675511  | 43704400  | 0.011075458 | 0.232918694 | #NAME?     | down |
| 5:50750151  | 50763242  | 0.042252644 | 0.232918694 | #NAME?     | down |
| 5:57230846  | 57231321  | 0.001757649 | 0.232918694 | #NAME?     | down |
| 5:61472681  | 61473037  | 0.004941386 | 0.232918694 | #NAME?     | down |
| 5:65224320  | 65226219  | 0.037107905 | 0.232918694 | #NAME?     | down |
| 5:65508067  | 65554946  | 0.043676314 | 0.232918694 | Inf        | up   |
| 5:65567513  | 65572286  | 0.010689385 | 0.232918694 | Inf        | up   |
| 5:69306817  | 69314043  | 0.021664871 | 0.232918694 | #NAME?     | down |
| 5:71502599  | 71512428  | 0.043502243 | 0.232918694 | Inf        | up   |
| 5:71548682  | 71549606  | 0.04478478  | 0.232918694 | Inf        | up   |
| 5:75384642  | 75386034  | 0.043512488 | 0.232918694 | Inf        | up   |
| 5:77046347  | 77048272  | 0.009934873 | 0.232918694 | -4.3120815 | down |
| 5:88804598  | 88823927  | 0.049042101 | 0.232918694 | #NAME?     | down |
| 5:90495677  | 90506674  | 0.005864078 | 0.232918694 | Inf        | up   |
| 5:94628811  | 94629167  | 0.044262041 | 0.232918694 | Inf        | up   |
| 5:94643273  | 94654752  | 0.003028309 | 0.232918694 | Inf        | up   |
| 5:97098937  | 97103094  | 0.00903939  | 0.232918694 | Inf        | up   |
| 5:98879552  | 98881375  | 0.040914963 | 0.232918694 | Inf        | up   |
| 5:113001084 | 113001674 | 0.043888258 | 0.232918694 | Inf        | up   |
| 5:119240419 | 119244576 | 0.010806356 | 0.232918694 | Inf        | up   |
| 5:122826126 | 122827646 | 0.040720642 | 0.232918694 | Inf        | up   |
| 5:129104956 | 129107062 | 0.002135855 | 0.232918694 | Inf        | up   |
| 5:131180095 | 131187109 | 0.042921167 | 0.232918694 | Inf        | up   |
| 5:133006759 | 133006920 | 0.039621828 | 0.232918694 | #NAME?     | down |
| 5:134666823 | 134671886 | 0.045142174 | 0.232918694 | Inf        | up   |
| 5:137634037 | 137639977 | 0.007126703 | 0.232918694 | Inf        | up   |
| 5:137692285 | 137698408 | 0.047503953 | 0.232918694 | Inf        | up   |
| 5:137952628 | 137954376 | 0.018037032 | 0.232918694 | #NAME?     | down |
| 5:139317053 | 139319501 | 0.047749626 | 0.232918694 | Inf        | up   |
| 5:140440119 | 140445975 | 0.018023912 | 0.232918694 | Inf        | up   |
| 5:146254943 | 146258593 | 0.005682604 | 0.232918694 | #NAME?     | down |
| 5:169681744 | 169684350 | 0.021097613 | 0.232918694 | Inf        | up   |
| 5:172057349 | 172061268 | 0.048938825 | 0.232918694 | Inf        | up   |
| 5:177244195 | 177246796 | 0.030947975 | 0.232918694 | Inf        | up   |
| 5:177536358 | 177539147 | 0.021304051 | 0.232918694 | -4.75922   | down |
| 5:179580947 | 179589647 | 0.020740586 | 0.232918694 | Inf        | up   |
| 5:179591625 | 179593645 | 0.033050146 | 0.232918694 | Inf        | up   |
| 6:2248837   | 2263684   | 0.028855688 | 0.232918694 | #NAME?     | down |
| 6:3085259   | 3104315   | 0.002676161 | 0.232918694 | Inf        | up   |
| 6:6248312   | 6250929   | 0.012774371 | 0.232918694 | Inf        | up   |
| 6:7176655   | 7182082   | 0.033275123 | 0.232918694 | Inf        | up   |
| 6:7176655   | 7189322   | 0.039045193 | 0.232918694 | -3.142908  | down |
| 6:11192345  | 11193692  | 0.049454243 | 0.232918694 | Inf        | up   |
| 6:13652659  | 13696896  | 0.033758184 | 0.232918694 | Inf        | up   |
| 6:15410224  | 15468718  | 0.038539985 | 0.232918694 | Inf        | up   |

|             |           |             |             |            |      |
|-------------|-----------|-------------|-------------|------------|------|
| 6:18212488  | 18213781  | 0.031844118 | 0.232918694 | Inf        | up   |
| 6:18256361  | 18258405  | 0.025093334 | 0.232918694 | Inf        | up   |
| 6:31269966  | 31354665  | 0.040891921 | 0.232918694 | #NAME?     | down |
| 6:32520164  | 32580856  | 0.040482027 | 0.232918694 | Inf        | up   |
| 6:33085779  | 33128098  | 0.001408465 | 0.232918694 | Inf        | up   |
| 6:36158648  | 36158941  | 0.033144743 | 0.232918694 | Inf        | up   |
| 6:36524341  | 36540207  | 0.000402196 | 0.232918694 | Inf        | up   |
| 6:42592151  | 42606651  | 0.04596421  | 0.232918694 | Inf        | up   |
| 6:42676056  | 42679832  | 0.008014481 | 0.232918694 | Inf        | up   |
| 6:46881455  | 46883665  | 0.031033774 | 0.232918694 | Inf        | up   |
| 6:47526628  | 47554766  | 0.035793546 | 0.232918694 | #NAME?     | down |
| 6:73473365  | 73480126  | 0.045397805 | 0.232918694 | Inf        | up   |
| 6:75634707  | 75678927  | 0.000755908 | 0.232918694 | #NAME?     | down |
| 6:78965703  | 78985428  | 0.016209242 | 0.232918694 | Inf        | up   |
| 6:85618818  | 85624112  | 0.028524828 | 0.232918694 | Inf        | up   |
| 6:90568558  | 90571807  | 0.000918785 | 0.232918694 | Inf        | up   |
| 6:104843223 | 104849246 | 0.01556177  | 0.232918694 | Inf        | up   |
| 6:107904629 | 107924932 | 0.045196226 | 0.232918694 | Inf        | up   |
| 6:110626776 | 110627145 | 0.041840161 | 0.232918694 | Inf        | up   |
| 6:111262257 | 111263946 | 0.042645144 | 0.232918694 | Inf        | up   |
| 6:111405470 | 111472140 | 0.048808325 | 0.232918694 | Inf        | up   |
| 6:116698704 | 116705160 | 0.007228601 | 0.232918694 | 4.61724891 | up   |
| 6:118479871 | 118483858 | 0.038336286 | 0.232918694 | Inf        | up   |
| 6:127812883 | 127813931 | 0.041269115 | 0.232918694 | #NAME?     | down |
| 6:129611533 | 129618852 | 0.042641521 | 0.232918694 | Inf        | up   |
| 6:130022227 | 130120958 | 0.017009385 | 0.232918694 | #NAME?     | down |
| 6:131164398 | 131169273 | 0.048878006 | 0.232918694 | Inf        | up   |
| 6:135039573 | 135042126 | 0.004057877 | 0.232918694 | #NAME?     | down |
| 6:136388393 | 136389517 | 0.023140319 | 0.232918694 | Inf        | up   |
| 6:136669283 | 136698682 | 0.021072355 | 0.232918694 | Inf        | up   |
| 6:136694140 | 136698682 | 0.007001154 | 0.232918694 | Inf        | up   |
| 6:138907495 | 138908816 | 0.010722741 | 0.232918694 | #NAME?     | down |
| 6:144490071 | 144493456 | 0.049841405 | 0.232918694 | Inf        | up   |
| 6:149765691 | 149773169 | 0.027931882 | 0.232918694 | Inf        | up   |
| 6:150795856 | 150800869 | 0.045370229 | 0.232918694 | Inf        | up   |
| 6:154773989 | 154795139 | 0.000569298 | 0.232918694 | #NAME?     | down |
| 6:154860738 | 154860998 | 0.021255813 | 0.232918694 | Inf        | up   |
| 6:158282263 | 158314268 | 0.000189527 | 0.192998461 | #NAME?     | down |
| 6:167022409 | 167033971 | 0.024493204 | 0.232918694 | Inf        | up   |
| 7:579256    | 607452    | 0.008338892 | 0.232918694 | Inf        | up   |
| 7:4983671   | 4989177   | 0.015317277 | 0.232918694 | Inf        | up   |
| 7:6585016   | 6585260   | 0.015353226 | 0.232918694 | Inf        | up   |
| 7:8022483   | 8071131   | 0.049676415 | 0.232918694 | Inf        | up   |
| 7:16216066  | 16278226  | 0.041825733 | 0.232918694 | Inf        | up   |
| 7:17845595  | 17850964  | 0.027194004 | 0.232918694 | 3.6465317  | up   |
| 7:23123777  | 23144025  | 0.041250455 | 0.232918694 | #NAME?     | down |
| 7:33357855  | 33388144  | 0.017579185 | 0.232918694 | Inf        | up   |
| 7:35879823  | 35885879  | 0.019112251 | 0.232918694 | #NAME?     | down |
| 7:38242428  | 38260230  | 0.043229704 | 0.232918694 | #NAME?     | down |
| 7:39997494  | 40002031  | 0.035306794 | 0.232918694 | #NAME?     | down |
| 7:39997494  | 40047877  | 0.02325452  | 0.232918694 | Inf        | up   |

|             |           |             |             |            |      |
|-------------|-----------|-------------|-------------|------------|------|
| 7:50319048  | 50382707  | 0.047367655 | 0.232918694 | Inf        | up   |
| 7:64336259  | 64336982  | 0.033953834 | 0.232918694 | Inf        | up   |
| 7:64937342  | 64937630  | 0.003359487 | 0.232918694 | Inf        | up   |
| 7:65979399  | 65980409  | 0.01693856  | 0.232918694 | Inf        | up   |
| 7:66127704  | 66134374  | 0.020793818 | 0.232918694 | -3.6034095 | down |
| 7:69899286  | 69899498  | 0.038233477 | 0.232918694 | Inf        | up   |
| 7:72831602  | 72831798  | 0.030625562 | 0.232918694 | Inf        | up   |
| 7:73459536  | 73470483  | 0.04923845  | 0.232918694 | Inf        | up   |
| 7:77571078  | 77597901  | 0.00130919  | 0.232918694 | Inf        | up   |
| 7:77585543  | 77600806  | 0.014582921 | 0.232918694 | 2.1579576  | up   |
| 7:77585543  | 77607301  | 0.020329981 | 0.232918694 | Inf        | up   |
| 7:90726567  | 90726812  | 0.033739155 | 0.232918694 | Inf        | up   |
| 7:90726567  | 90747775  | 0.023059017 | 0.232918694 | Inf        | up   |
| 7:92079079  | 92080152  | 0.007941076 | 0.232918694 | Inf        | up   |
| 7:92221902  | 92222978  | 0.040420152 | 0.232918694 | Inf        | up   |
| 7:92294889  | 92307656  | 0.045927331 | 0.232918694 | -2.5541772 | down |
| 7:92307359  | 92327900  | 0.042054108 | 0.232918694 | Inf        | up   |
| 7:92457552  | 92492286  | 0.013294743 | 0.232918694 | #NAME?     | down |
| 7:98190728  | 98194572  | 0.016409516 | 0.232918694 | #NAME?     | down |
| 7:100328836 | 100332576 | 0.032701622 | 0.232918694 | Inf        | up   |
| 7:103128483 | 103128792 | 0.025542042 | 0.232918694 | Inf        | up   |
| 7:103353921 | 103355793 | 0.040406042 | 0.232918694 | #NAME?     | down |
| 7:105090009 | 105091314 | 0.013816879 | 0.232918694 | Inf        | up   |
| 7:105665066 | 105665288 | 0.022418911 | 0.232918694 | Inf        | up   |
| 7:106872537 | 106886292 | 0.043117842 | 0.232918694 | Inf        | up   |
| 7:112286873 | 112287074 | 6.81E-05    | 0.116074475 | Inf        | up   |
| 7:121170582 | 121266779 | 0.006046132 | 0.232918694 | #NAME?     | down |
| 7:128642217 | 128648982 | 0.030763664 | 0.232918694 | Inf        | up   |
| 7:130039464 | 130049144 | 0.045981009 | 0.232918694 | #NAME?     | down |
| 7:130170400 | 130181719 | 0.04158064  | 0.232918694 | #NAME?     | down |
| 7:131387120 | 131388972 | 0.035716961 | 0.232918694 | Inf        | up   |
| 7:138519189 | 138551180 | 0.00507146  | 0.232918694 | Inf        | up   |
| 7:139266333 | 139272440 | 0.015100049 | 0.232918694 | #NAME?     | down |
| 7:139409563 | 139412580 | 0.020481812 | 0.232918694 | #NAME?     | down |
| 7:155672867 | 155685052 | 0.00051676  | 0.232918694 | #NAME?     | down |
| 7:155700773 | 155707068 | 0.044202455 | 0.232918694 | #NAME?     | down |
| 7:155711173 | 155718443 | 0.025849746 | 0.232918694 | Inf        | up   |
| 7:156826605 | 156836885 | 0.002514351 | 0.232918694 | Inf        | up   |
| 7:157201721 | 157231327 | 0.033015634 | 0.232918694 | Inf        | up   |
| 7:158876609 | 158891333 | 0.002759737 | 0.232918694 | Inf        | up   |
| 8:690898    | 692612    | 0.008151094 | 0.232918694 | #NAME?     | down |
| 8:8154187   | 8154530   | 0.045455849 | 0.232918694 | Inf        | up   |
| 8:25407983  | 25408940  | 0.029639034 | 0.232918694 | #NAME?     | down |
| 8:30101898  | 30104486  | 0.00244176  | 0.232918694 | Inf        | up   |
| 8:37870420  | 37877551  | 0.014567011 | 0.232918694 | Inf        | up   |
| 8:38110379  | 38110833  | 0.023432537 | 0.232918694 | Inf        | up   |
| 8:38114192  | 38116725  | 0.00261005  | 0.232918694 | Inf        | up   |
| 8:38114192  | 38121149  | 0.016106187 | 0.232918694 | #NAME?     | down |
| 8:38133454  | 38135766  | 0.028202043 | 0.232918694 | #NAME?     | down |
| 8:39021643  | 39023325  | 0.034326194 | 0.232918694 | Inf        | up   |
| 8:42957094  | 42964474  | 0.039446555 | 0.232918694 | Inf        | up   |

|             |           |             |             |            |      |
|-------------|-----------|-------------|-------------|------------|------|
| 8:43002107  | 43013400  | 0.033797151 | 0.232918694 | Inf        | up   |
| 8:51857460  | 51861246  | 0.043854379 | 0.232918694 | Inf        | up   |
| 8:61633683  | 61653660  | 0.028858048 | 0.232918694 | Inf        | up   |
| 8:67093543  | 67095732  | 0.001345897 | 0.232918694 | -4.5560662 | down |
| 8:67103037  | 67137603  | 0.032510834 | 0.232918694 | Inf        | up   |
| 8:68022036  | 68038292  | 0.026718665 | 0.232918694 | #NAME?     | down |
| 8:73688654  | 73738349  | 0.047366152 | 0.232918694 | Inf        | up   |
| 8:100287501 | 100288267 | 0.035648116 | 0.232918694 | Inf        | up   |
| 8:109409865 | 109420690 | 0.035101132 | 0.232918694 | Inf        | up   |
| 8:123140761 | 123144855 | 0.035676369 | 0.232918694 | Inf        | up   |
| 8:123337625 | 123339446 | 0.036612225 | 0.232918694 | Inf        | up   |
| 8:129903312 | 129904585 | 0.020514265 | 0.232918694 | Inf        | up   |
| 8:130236922 | 130358143 | 0.034076667 | 0.232918694 | #NAME?     | down |
| 8:140739018 | 140752316 | 0.008005437 | 0.232918694 | Inf        | up   |
| 8:140818277 | 140864399 | 0.02163994  | 0.232918694 | Inf        | up   |
| 8:140830472 | 140890769 | 0.046962413 | 0.232918694 | #NAME?     | down |
| 8:144791773 | 144792140 | 0.046715814 | 0.232918694 | Inf        | up   |
| 9:271627    | 289581    | 0.022531699 | 0.232918694 | Inf        | up   |
| 9:2161686   | 2161903   | 0.046244654 | 0.232918694 | #NAME?     | down |
| 9:6477622   | 6482099   | 0.045728528 | 0.232918694 | Inf        | up   |
| 9:14639896  | 14680162  | 0.047695529 | 0.232918694 | #NAME?     | down |
| 9:17330632  | 17342444  | 0.000687387 | 0.232918694 | #NAME?     | down |
| 9:20413721  | 20414425  | 0.027265823 | 0.232918694 | Inf        | up   |
| 9:26984257  | 27011968  | 0.044200345 | 0.232918694 | Inf        | up   |
| 9:33953285  | 33963791  | 0.006708146 | 0.232918694 | Inf        | up   |
| 9:33960826  | 33989126  | 0.033374523 | 0.232918694 | 1.75082591 | up   |
| 9:33986760  | 33989126  | 0.016623591 | 0.232918694 | #NAME?     | down |
| 9:34269257  | 34271930  | 0.046918408 | 0.232918694 | Inf        | up   |
| 9:70053992  | 70054173  | 0.048858487 | 0.232918694 | Inf        | up   |
| 9:71690092  | 71698204  | 0.031434337 | 0.232918694 | Inf        | up   |
| 9:77922161  | 77935889  | 0.047857004 | 0.232918694 | Inf        | up   |
| 9:79573689  | 79654075  | 0.048656973 | 0.232918694 | Inf        | up   |
| 9:85974967  | 85978381  | 0.037488899 | 0.232918694 | #NAME?     | down |
| 9:86033282  | 86046572  | 0.045575208 | 0.232918694 | Inf        | up   |
| 9:94923986  | 94956015  | 0.008234826 | 0.232918694 | Inf        | up   |
| 9:96320998  | 96324169  | 0.027268444 | 0.232918694 | Inf        | up   |
| 9:96465337  | 96465778  | 0.019479184 | 0.232918694 | #NAME?     | down |
| 9:104722868 | 104723718 | 0.032259266 | 0.232918694 | Inf        | up   |
| 9:109050283 | 109064567 | 0.025840605 | 0.232918694 | Inf        | up   |
| 9:121171159 | 121171548 | 0.04603178  | 0.232918694 | Inf        | up   |
| 9:122280443 | 122291840 | 0.001586874 | 0.232918694 | Inf        | up   |
| 9:123169902 | 123173842 | 0.001853127 | 0.232918694 | #NAME?     | down |
| 9:123179007 | 123184298 | 0.007817991 | 0.232918694 | #NAME?     | down |
| 9:123757703 | 123879021 | 0.020949362 | 0.232918694 | #NAME?     | down |
| 9:124899329 | 124900547 | 0.039636652 | 0.232918694 | #NAME?     | down |
| 9:128718325 | 128718625 | 0.042613225 | 0.232918694 | Inf        | up   |
| 9:128907157 | 128909321 | 0.008972958 | 0.232918694 | #NAME?     | down |
| 9:129098013 | 129098650 | 0.031926991 | 0.232918694 | Inf        | up   |
| 9:135947798 | 135953753 | 0.048306705 | 0.232918694 | Inf        | up   |
| 9:137790848 | 137800984 | 0.033635658 | 0.232918694 | Inf        | up   |
| X:2719661   | 2726373   | 0.008885733 | 0.232918694 | #NAME?     | down |

|             |           |             |             |        |      |
|-------------|-----------|-------------|-------------|--------|------|
| X:17103718  | 17138961  | 0.017984135 | 0.232918694 | Inf    | up   |
| X:19050806  | 19050981  | 0.022442845 | 0.232918694 | Inf    | up   |
| X:24172715  | 24179770  | 0.029223043 | 0.232918694 | #NAME? | down |
| X:37386599  | 37426000  | 0.035302846 | 0.232918694 | Inf    | up   |
| X:51327721  | 51357027  | 0.043420974 | 0.232918694 | Inf    | up   |
| X:53645311  | 53654131  | 0.029077251 | 0.232918694 | Inf    | up   |
| X:65075606  | 65113813  | 0.038439585 | 0.232918694 | #NAME? | down |
| X:67116173  | 67116338  | 0.045634816 | 0.232918694 | Inf    | up   |
| X:68192919  | 68201710  | 0.005947    | 0.232918694 | Inf    | up   |
| X:78014662  | 78021079  | 0.023434484 | 0.232918694 | #NAME? | down |
| X:118442244 | 118443687 | 0.04836177  | 0.232918694 | Inf    | up   |
| X:118542725 | 118543593 | 0.010078355 | 0.232918694 | Inf    | up   |
| X:119629318 | 119629508 | 2.74E-05    | 0.091475138 | Inf    | up   |
| X:121090399 | 121093477 | 0.002260396 | 0.232918694 | #NAME? | down |
| X:132281095 | 132283032 | 0.046309991 | 0.232918694 | Inf    | up   |
| X:148651999 | 148662768 | 0.0137521   | 0.232918694 | Inf    | up   |
| X:155415575 | 155419562 | 0.006508547 | 0.232918694 | Inf    | up   |
| X:155506898 | 155537118 | 0.034817087 | 0.232918694 | Inf    | up   |
| Y:2961074   | 2961646   | 0.04528401  | 0.232918694 | Inf    | up   |
| Y:12709388  | 12722187  | 0.002719312 | 0.232918694 | #NAME? | down |
